# Supplementary material
Source: PubMed Central journal article supplement (PMC6669957)
Supplement: nxy126_supplemental_figures.pdf [file nxy126_supplemental_figures.pdf]

Supplementary Data

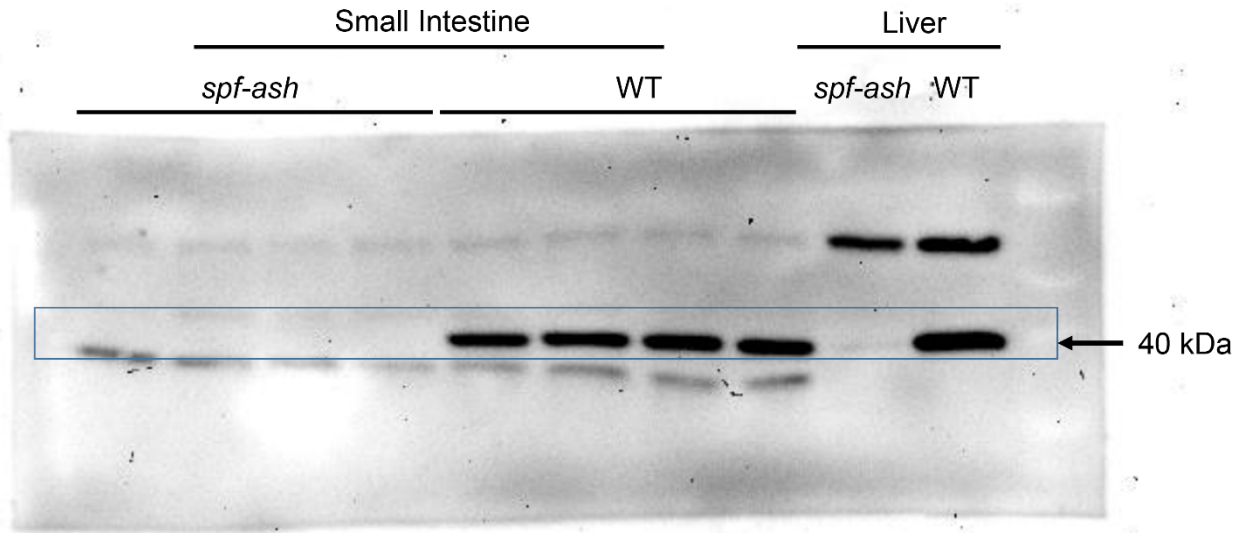

Supplemental Figure 1. OTC detection in small intestine of ICR wild type (WT) and ICR<sup>spf-ash</sup> (*spf-ash*) mice. Protein was overload (60  $\mu$ g) in order to improve detection. Liver (protein load 10  $\mu$ g) from WT and *spf-ash* mice are shown as positive controls. The antibody used was GTX105140 (GeneTex Inc., Irvine, CA; dilution 1:6000).

Supplementary Data

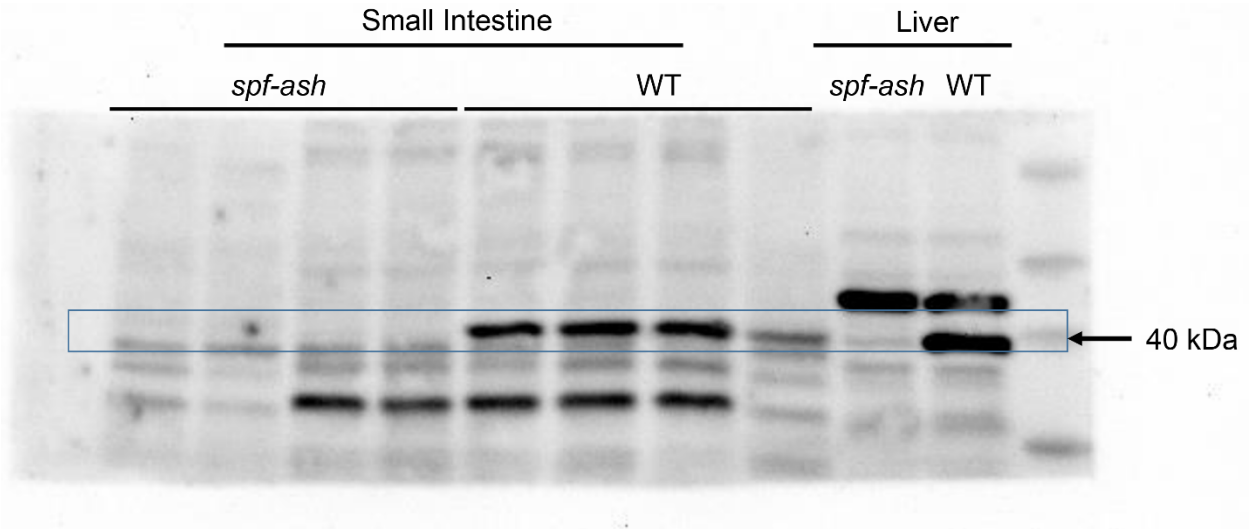

Supplemental Figure 2. OTC detection in small intestine of ICR wild type (WT) and ICR<sup>spf-ash</sup> (*spf-ash*) mice. Liver from WT and *spf-ash* mice are shown as positive controls. The antibody used was AV41766 (Sigma-Aldrich, Saint Louis, MO; dilution 1:2000).

Supplementary Data

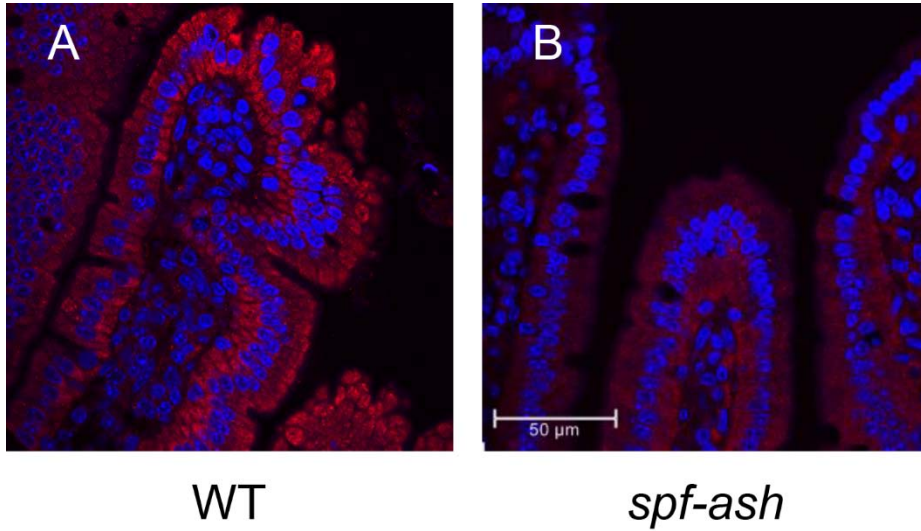

Supplemental Figure 3. OTC immunohistochemistry in gut samples from ICR wild type (A, WT) and ICR<sup>*spf-ash*</sup> (B, *spf-ash*) mice. Representative immunohistochemistry figures are shown. Shown in red OTC, in blue nuclei (DAPI). A black and white version of this figure is shown in Fig. 2.

Supplementary Data

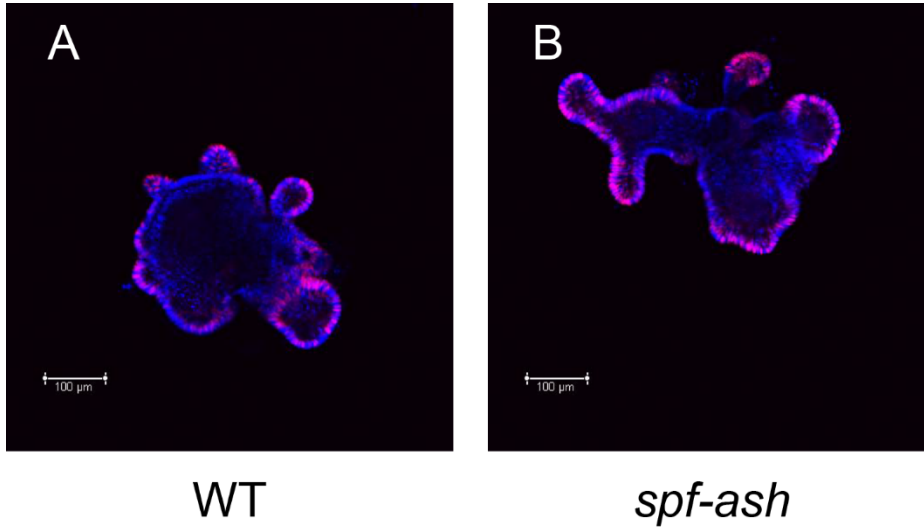

Supplemental Figure 4. Enteroids derived from ICR wild type (WT, A) and ICR<sup>*spf-ash*</sup> (*spf-ash*, B) mice. Enteroids are shown using fluorescence microscopy. In blue, nuclei (DAPI) and in magenta, proliferating cells (EdU). A black and white version of this figure is shown in Fig. 3.

Supplementary Data

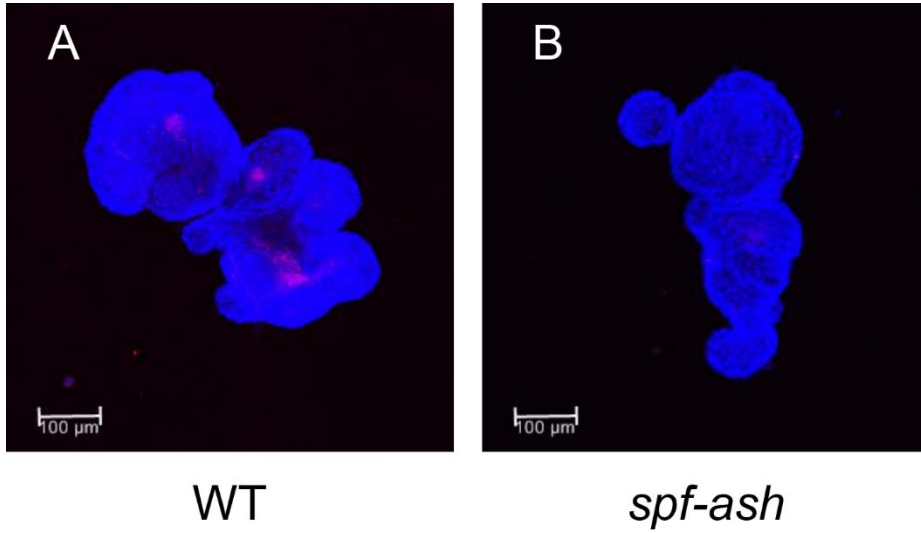

Supplemental Figure 5. OTC immunohistochemistry in enteroids derived from ICR wild type (A, WT) and ICR<sup>*spf-ash*</sup> (B, *spf-ash*) mice. Representative immunohistochemistry figures are shown. Shown in red OTC, in blue nuclei (DAPI). A black and white version of this figure is shown in Fig. 4.
